# Supplementary material for: Enhanced spin Seebeck effect signal due to spin-momentum locked topological surface states
Source: PubMed Central journal article supplement (PMC4857385; doi:10.1038/ncomms11458), 2016-05-04
Supplement: ncomms11458-s1.pdf [file ncomms11458-s1.pdf]

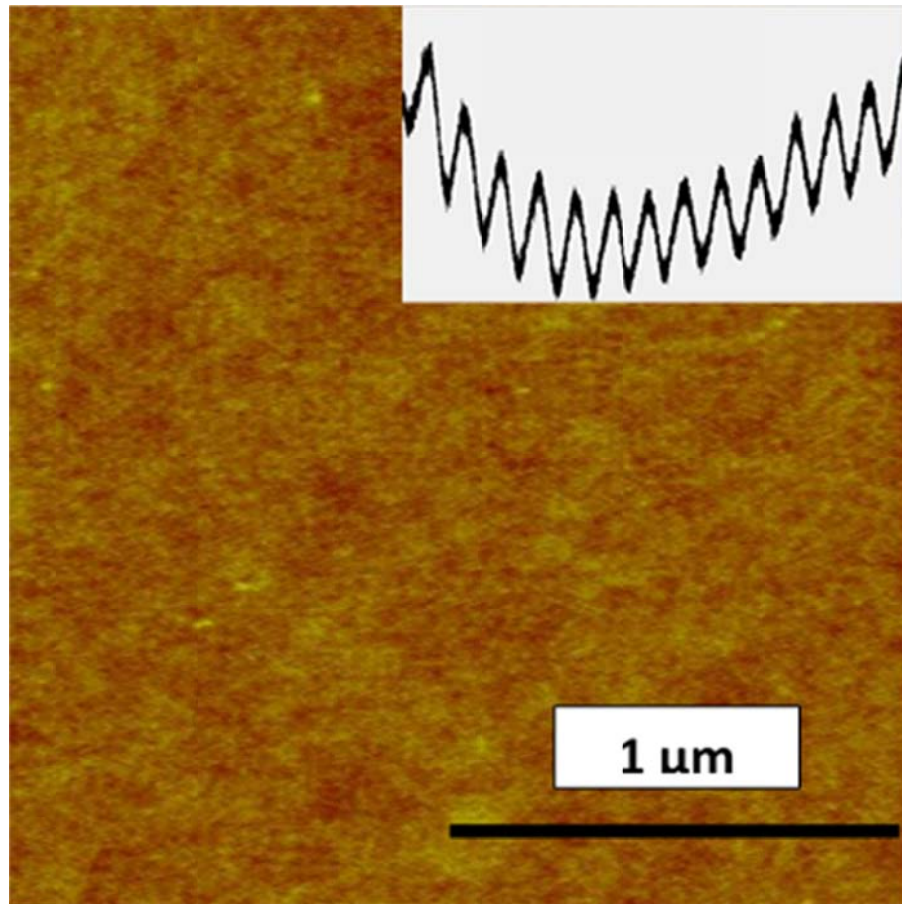

**Supplementary Figure 1. AFM image ( $2\ \mu\text{m} \times 2\ \mu\text{m}$ ) of a representative YIG (111) thin film.** The 20 nm thick YIG films are atomically flat with a typical rms roughness  $\sim 0.12$  nm. Flat YIG surface is important for high quality TI films. Prior to growth, the substrate is heated ( $600\ \text{°C}$  for 30 min) to remove organic contamination. The inset shows the RHEED intensity oscillations during YIG growth.

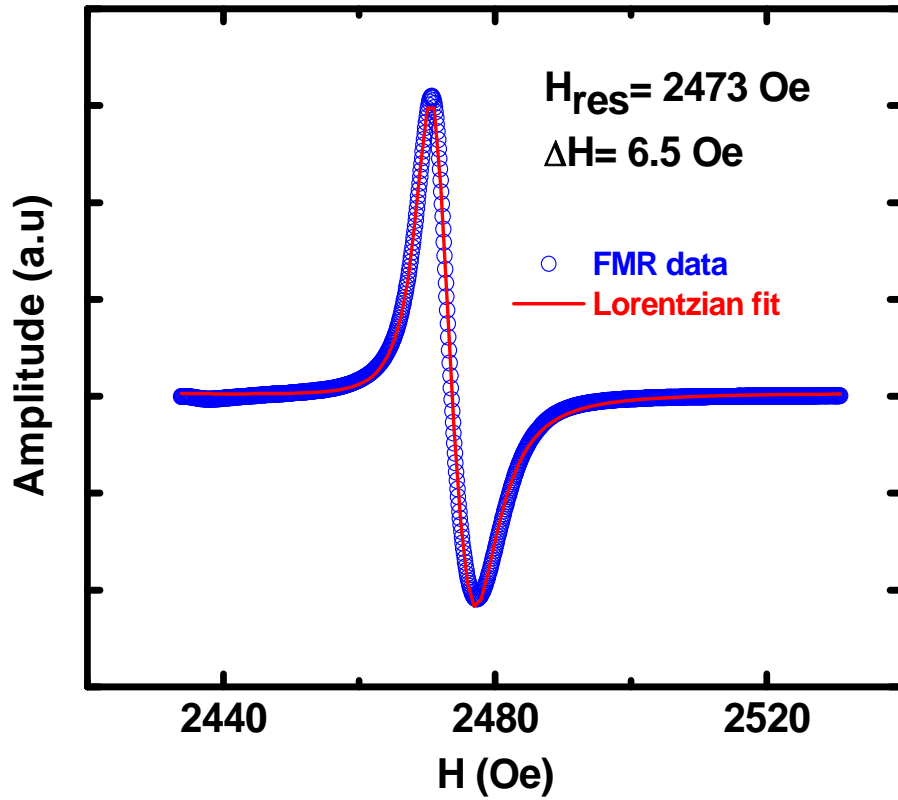

**Supplementary Figure 2. Typical FMR spectrum for 20 nm thick YIG films on GGG (111).** In the FMR spectrum taken at 9.6 GHz, the blue circles are the experimental data and the red line is a Lorentzian fit. The FMR linewidth ( $\Delta H$ ) obtained from the fit is as narrow as 6.5 Oe. The measured resonance field ( $H_{\text{res}}$ ) yields  $4\pi M_s \sim 2200$  Oe from the Kittel formula.

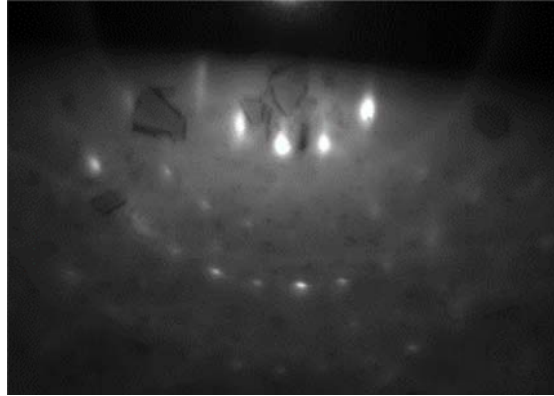

**a, YIG (111)/ GGG substrate after deposition in PLD**

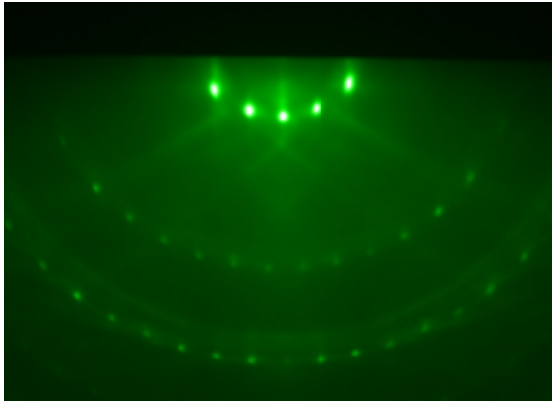

**b, YIG (111)/ GGG substrate prior to TI growth in MBE**

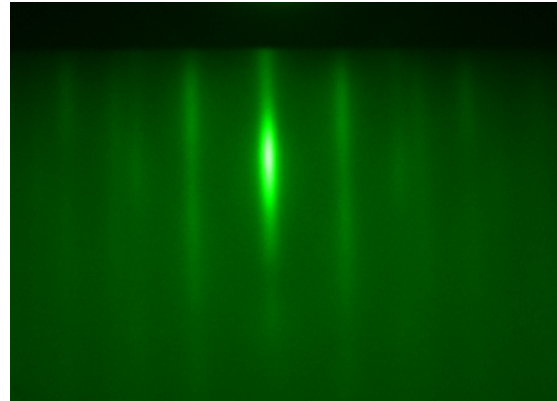

**c, 5 QL  $(\text{Bi}_{0.24}\text{Sb}_{0.76})_2\text{Te}_3$  grown on YIG**

**Supplementary Figure 3. RHEED patterns of YIG substrate and TI film on YIG. a,** YIG film is epitaxially grown on GGG as indicated by the RHEED pattern taken in the PLD chamber. **b,** RHEED pattern taken on YIG prior to TI growth in the MBE chamber excludes the possibility of degradation during sample transfer and annealing. **c,** RHEED pattern of 5 QL  $(\text{Bi}_{0.24}\text{Sb}_{0.76})_2\text{Te}_3$  grown on YIG indicates very flat TI surface and high quality crystalline TI film.

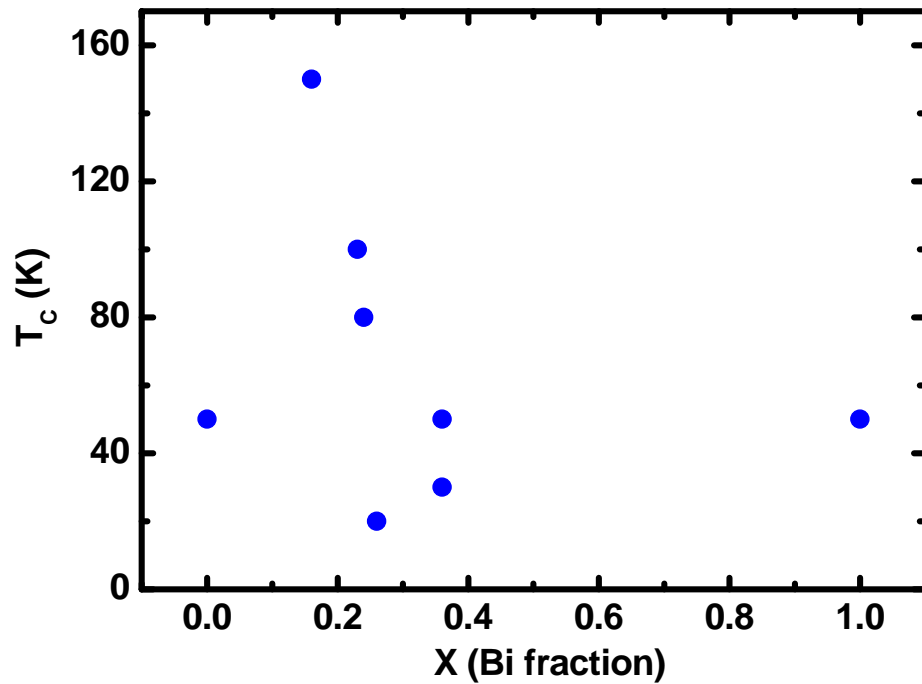

**Supplementary Figure 4. Curie temperature ( $T_C$ ) of the ferromagnetic TI surface vs. Bi fraction.**  $T_C$  of induced ferromagnetic TI surface was determined from the AHE measurements in samples with various Bi fractions.  $T_C$  is not obviously correlated with the Bi fraction/carrier concentration. The ferromagnetic transition is far below 300 K at which the SSE experiments were conducted.

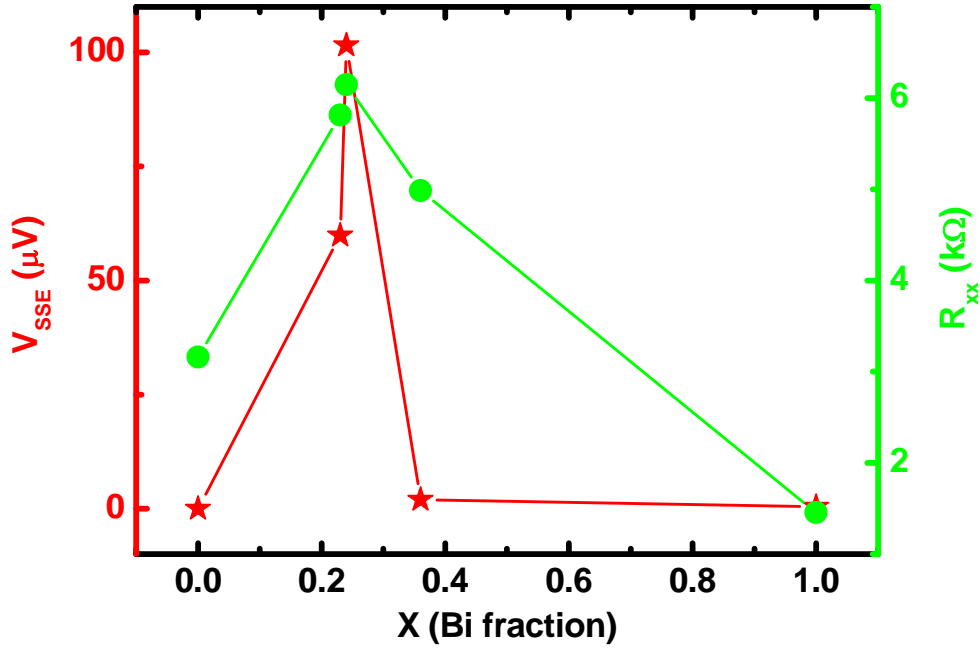

**Supplementary Figure 5.  $V_{SSE}$  and corresponding  $R_{xx}$  vs. Bi fraction.** The left ( $V_{SSE}$ ) and right ( $R_{xx}$ ) axes denote the SSE voltage and corresponding longitudinal sheet resistance respectively for heterostructure samples with different  $x$ 's. As Bi fraction is decreased from 1 to 0.24,  $V_{SSE}$  shows an abrupt change by a factor of 200, while  $R_{xx}$  only increases by a factor of 4.

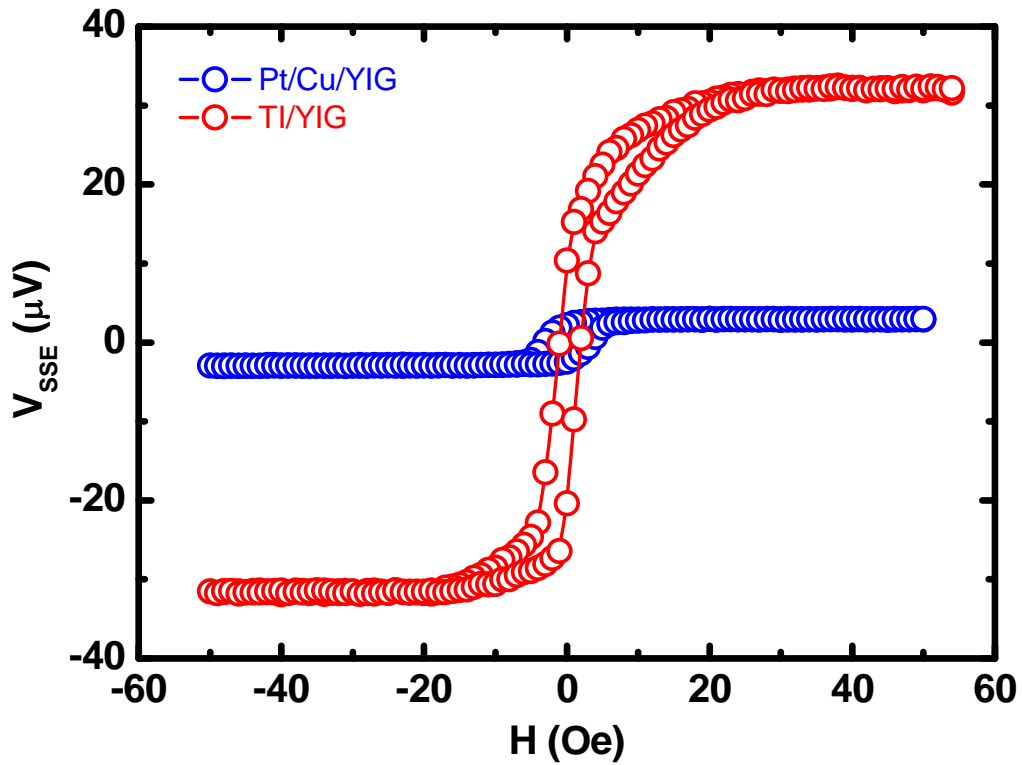

**Supplementary Figure 6. A comparison between SSE signals from Pt/Cu/YIG and TI/YIG devices.** In Pt/Cu/YIG, a 3 nm Cu spacer layer is inserted between a 5 nm thick Pt and YIG to suppress the proximity effect induced anomalous Nernst contribution. The other device consists of 5 QL  $(\text{Bi}_{0.24}\text{Sb}_{0.76})_2\text{Te}_3$ , the most insulating TI and YIG. The SSE voltage generated by TI/YIG is one order of magnitude larger than that by Pt/Cu/YIG.

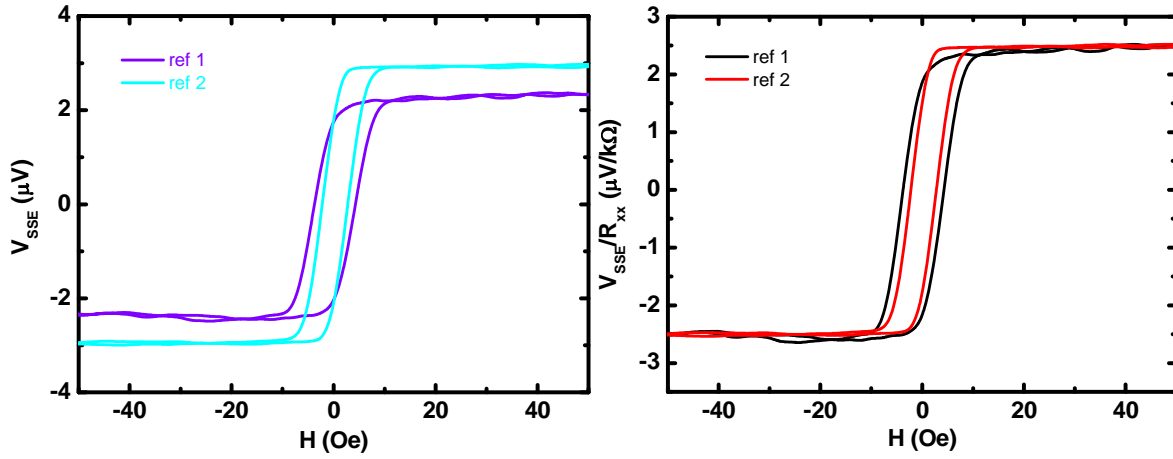

**Supplementary Figure 7. Comparison between SSE signals from two Pt/YIG samples.** Two Pt (5 nm)/YIG (20 nm) samples were fabricated at different times. YIG was grown by PLD, while Pt was deposited by sputtering in a different chamber. The fabrication requires breaking the vacuum and transfer in air after YIG growth. These two samples (ref 1 and ref 2) have the same nominal device geometry and were measured under the same conditions. The SSE voltage shows a variation of  $\sim 20\%$  in magnitude; however  $V_{SSE}/R_{xx}$  only differs by less than 5%. These results indicate the interface quality in these samples does not vary significantly to cause large variations in SSE magnitude.
